# Supplementary material
Source: MDPI journal article supplement (https://www.mdpi.com/2673-3994/5/1/5)
Supplement: s1 [file s1]

## Supplementary Material

Table S1: Organic Compound Composition in Biocrude.

| S. No. | RT        | Compounds                                | Peak Area (%) |             |                  |                 |               |               | Wood<br>Cont. 350 | Wood<br>Cont. 400 |
|--------|-----------|------------------------------------------|---------------|-------------|------------------|-----------------|---------------|---------------|-------------------|-------------------|
|        |           |                                          | Wood<br>350   | Wood<br>400 | Algae Sp.<br>350 | Algae<br>Sp.400 | Lignin<br>350 | Lignin<br>400 |                   |                   |
|        |           | <b>Ketones</b>                           |               |             |                  |                 |               |               |                   |                   |
| 1      | 2.71      | 2-Butanone                               | 1.21          | 1.41        | 2.13             | 2.11            | 0.97          | 1.11          | 1.21              | 1.41              |
| 2      | 7.78      | 2-Pentanone, 4-hydroxy-4-methyl-         | 1.34          | 2.14        | 3.43             | 2.45            | 3.14          | 1.75          | 1.34              | 2.14              |
| 3      | 9.22      | 2-Cyclopenten-1-one, 2-methyl-           | 2.12          | 1.34        | 1.43             | 2.56            | 1.54          | 0.78          | 2.12              | 1.34              |
| 4      | 10.22     | 3-Ethylcyclopentanone                    | 1.11          | 1.56        | 1.87             | 2.52            | 1.01          | 1.87          | 1.11              | 1.56              |
| 5      | 11.46     | 4,4-Dimethyl-2-cyclopenten-1-one         | 2.32          | 2.12        | 2.65             | 2.45            | 1.34          | 1.89          | 2.32              | 2.12              |
| 6      | 22.89     | 2-Nonadecanone                           | 1.98          | 1.34        | 1.67             | 1.54            | 1.87          | 0.67          | 1.98              | 1.34              |
|        |           | <b>Acids and esters</b>                  |               |             |                  |                 |               |               |                   |                   |
| 7      | 2.77      | Acetic acid                              | 1.43          | 0.87        | 1.11             | 0.75            | 0.91          | 1.23          | 1.43              | 0.87              |
| 8      | 16.01     | 2,5-Octadecadiynoic acid, methyl ester   | 0.33          | 0.56        | 1.78             | 0.56            | 0.56          | 1.23          | 0.33              | 0.56              |
| 9      | 19.51     | 5-Benzofuranacetic acid, 6-ethenyl       | 1.73          | 0.87        | 1.45             | 1.26            | 0.89          | 0.89          | 1.73              | 0.87              |
| 10     | 29.65     | Oleic acid, eicosyl ester                | 1.12          | 0.83        | 1.55             | 1.32            | 1.11          | 0.98          | 1.12              | 0.83              |
|        |           | <b>Aromatics</b>                         |               |             |                  |                 |               |               |                   |                   |
| 11     | 7.51      | 8 3,5-Dihydroxytolune                    | 3.13          | 3.98        | 1.13             | 1.89            | 4.55          | 5.12          | 3.13              | 3.98              |
| 12     | 10.<br>77 | Phenol                                   | 3.15          | 3.47        | 1.15             | 2.47            | 2.12          | 3.47          | 3.15              | 3.47              |
| 13     | 12.05     | Phenol, 2-methyl-                        | 3.56          | 4.76        | 0.65             | 2.67            | 3.65          | 4.76          | 3.56              | 4.76              |
| 14     | 13.87     | Phenol, 3-ethyl-                         | 2.34          | 2.70        | 1.98             | 1.75            | 1.98          | 2.70          | 2.34              | 2.70              |
| 15     | 14.29     | Creosol                                  | 1.15          | 1.65        | ND               | ND              | 1.15          | 1.65          | 1.15              | 1.65              |
| 16     | 15.57     | Phenol, 4-ethyl-2-methoxy-               | 3.23          | 3.45        | ND               | ND              | 3.12          | 2.45          | 3.23              | 3.45              |
| 17     | 16.57     | Phenol, 2,6-dimethoxy-                   | 2.45          | 0.45        | 1.65             | 1.68            | 1.65          | 3.45          | 2.45              | 0.45              |
| 18     | 8.58      | 1 1,2,3-Trihydroxybenzene                | 1.10          | 1.67        | 0.11             | 1.67            | 3.12          | 1.67          | 1.10              | 1.67              |
| 19     | 9.27      | 3 4-[(1E)-3-hydroxyprop-1-en-1-yl]phenol | 0.57          | 0.98        | 0.68             | 1.98            | 0.67          | 0.98          | 0.57              | 0.98              |
|        |           | <b>Hydrocarbons</b>                      |               |             |                  |                 |               |               |                   |                   |
| 20     | 8.94      | 2-Octene                                 | 1.35          | 1.67        | 2.34             | 2.78            | 1.32          | 0.92          | 1.35              | 1.67              |
| 21     | 11.64     | 1-Methylcyclooctene                      | 1.11          | 1.23        | 0.98             | 2.11            | 1.42          | 0.73          | 1.11              | 1.23              |
| 22     | 14.77     | 1,5,5-Trimethyl-6-methylene-cyclohexene  | 1.31          | 1.67        | 2.34             | 2.78            | 1.65          | 0.96          | 1.31              | 1.67              |

|    |       |                                        |       |       |       |       |       |       |       |       |
|----|-------|----------------------------------------|-------|-------|-------|-------|-------|-------|-------|-------|
| 23 | 17.12 | Hexadecane                             | 1.35  | 1.67  | 2.34  | 2.78  | 1.32  | 0.98  | 1.35  | 1.67  |
| 24 | 25.16 | Octadecane, 3-ethyl-5-(2-ethylbutyl)-  | 1.35  | 1.67  | 2.34  | 2.78  | 1.32  | 0.98  | 1.35  | 1.67  |
|    |       | <b>N-containing compounds</b>          |       |       |       |       |       |       |       |       |
| 25 | 6.91  | Pyrimidine, 2-methyl-                  | ND    | ND    | 6.5   | 5.2   | 0.21  | 1.41  | 1.21  | 1.41  |
| 26 | 9.22  | Propanamide, N-methyl-                 | 1.21  | 1.41  | 3.4   | 2.7   | 1.34  | 2.14  | 1.34  | 2.14  |
| 27 | 12.13 | 2-Pyrrolidinone                        | 1.34  | 2.14  | 1.5   | 1.2   | 1.12  | 1.34  | 2.12  | 1.34  |
| 28 | 12.45 | 3-Aminopyridine                        | 2.12  | 1.34  | 2.5   | 1.5   | 0.98  | 1.12  | 1.21  | 1.41  |
| 29 | 13.67 | Piperidine-2,5-dione                   | 1.11  | 1.56  | 3.42  | 0.4   | 0.89  | 0.77  | 1.34  | 2.14  |
| 30 | 25.53 | Dodecanamide,                          | 0.98  | 1.12  | 1.22  | 0.66  | 0.86  | 1.33  | 0.98  | 1.12  |
| 31 | 25.85 | N-Methyldodecanamide,                  | 0.89  | 0.77  | 0.55  | 0.67  | 0.89  | 0.77  | 0.89  | 0.77  |
| 32 | 27.11 | 9-Octadecenamide- (Z)]                 | 0.12  | 0.56  | 0.78  | 0.44  | 1.32  | 0.67  | 0.12  | 0.56  |
|    |       | <b>Alcohols and Aldehydes</b>          |       |       |       |       |       |       |       |       |
| 33 | 12.81 | Cyclohexanol, 3,3,5-trimethyl          | 1.22  | 1.45  | 1.43  | 2.34  | 1.21  | 1.41  | 1.22  | 1.45  |
| 34 | 18.29 | 1,1-Diphenyl-4-phenylthiobut-3-en-1-ol | 1.56  | 1.78  | 1.87  | 2.89  | 1.34  | 2.14  | 1.21  | 1.41  |
| 35 | 9.86  | cis-4-Decenal                          | 0.98  | 0.67  | ND    | ND    | 2.12  | 1.34  | ND    | ND    |
|    |       | Total area covered                     | 53.23 | 57.23 | 59.65 | 51.21 | 52.87 | 59.48 | 55.23 | 55.23 |

ND: Not Detected.
